1 The tryptophan salvage pathway is dynamically regulated by the  
2 iron-dependent repressor YtgR in *Chlamydia trachomatis*

3

4 Nick D. Pokorzynski<sup>1</sup> and Rey A. Carabeo<sup>1</sup>

5

6 <sup>1</sup>Center for Reproductive Biology, School of Molecular Biosciences, College of  
7 Veterinary Medicine, Washington State University, Pullman, WA, USA, 99164.

8

9

10

11

12

13

14

15 **Corresponding Author:**

16 Rey A. Carabeo

17 1770 NE Stadium Way, Biotechnology & Life Sciences Bldg., Washington State

18 University

19 Pullman, WA, 99164

20 (509) 335-7788

21 [rey.carabeo@wsu.edu](mailto:rey.carabeo@wsu.edu)

22 **Keywords:** stress response, transcription, tryptophan biosynthesis, iron-dependent

23 regulation, repression

24 **Abstract**

25 Mammalian hosts restrict cellular nutrient availability to starve invading pathogens and  
26 successfully clear an infection by a process termed “nutritional immunity”. For the  
27 obligate intracellular pathogen *Chlamydia trachomatis*, nutritional immunity likely  
28 encompasses the simultaneous limitation of the amino acid tryptophan and the essential  
29 biometal iron. Unlike other model bacteria, *C. trachomatis* lacks many global stress  
30 response systems – such as “stringent response” homologs – adapted to these host  
31 insults. However, a physiological response by *Chlamydia* that is common to both  
32 stresses is the development of an aberrant, “persistent” state, suggesting that  
33 tryptophan and iron starvation trigger a coordinated developmental program. Here, we  
34 report that the *trpRBA* operon for tryptophan salvage in *C. trachomatis* serovar L2 is  
35 regulated at the transcriptional level by iron. The expression of the tryptophan synthase  
36 encoding genes, *trpBA*, is induced following iron limitation while that of the repressor  
37 *trpR* is not. We show that this specific induction of *trpBA* expression initiates from a  
38 novel promoter element within an intergenic region flanked by *trpR* and *trpB*. YtgR, a  
39 DtxR-homolog and the only known iron-dependent transcriptional regulator in  
40 *Chlamydia*, can bind to the *trpRBA* intergenic region upstream of the alternative *trpBA*  
41 promoter to repress transcription. This binding also likely attenuates transcription from  
42 the primary promoter upstream of *trpR* by blocking RNA polymerase read-through.  
43 These data illustrate a dynamic and integrated method of regulating tryptophan  
44 biosynthesis in an iron-dependent manner, which has not been described in any other  
45 prokaryote, underscoring the uniqueness of *Chlamydia*.

46

## 47 **Significance Statement**

48 Genital serovars of the obligate intracellular parasite *Chlamydia trachomatis* are the  
49 leading cause of bacterial sexually-transmitted infections globally. Proliferation of *C.*  
50 *trachomatis* is likely controlled by simultaneous immunological and environmental  
51 restriction of critical nutrients such as tryptophan and iron. However, our understanding  
52 of the immediate chlamydial responses to these stimuli is poorly defined. We utilized  
53 expression of the stress-responsive *trpRBA* operon in *C. trachomatis* L2 as a proxy for  
54 regulatory integration between iron and tryptophan limitation. We identified a unique  
55 iron-dependent regulatory mechanism for *trpRBA* in *C. trachomatis*, mediated by the  
56 transcriptional repressor YtgR. This distinguishes *Chlamydia* from other bacteria which  
57 regulate tryptophan biosynthesis strictly by tryptophan-dependent mechanisms,  
58 highlighting a distinct evolutionary adaptation in *C. trachomatis* to integrate stress  
59 responses.

60

61

62

63

64

65

66

67

68

69

70 /body

## 71 **Introduction**

72 Nutrient acquisition is critical for the success of pathogenic bacteria. Many  
73 pathogenic bacteria must siphon nutrients from their hosts, such as nucleotides, amino  
74 acids and biometals (1–4). This common feature among pathogens renders them  
75 susceptible to nutrient limitation strategies associated with the host immune response  
76 (5). Counteractively, bacterial pathogens have evolved sophisticated molecular  
77 mechanisms to counter nutrient deprivation, involving increasingly complex and  
78 sophisticated nutrient-sensing regulatory networks. These stress response mechanisms  
79 are essential for pathogens to avoid clearance by the immune system. By delineating  
80 their function at the molecular level, we can better target aspects of the host-pathogen  
81 interface suitable for therapeutic manipulation. However, stress responses in the  
82 obligate intracellular bacterium *Chlamydia trachomatis* are relatively poorly  
83 characterized, leaving unanswered many fundamental questions about the biology of  
84 this pathogen.

85 *Chlamydia trachomatis* is the leading cause of bacterial sexually transmitted  
86 infections (STIs) and infection-derived blindness worldwide (6–8). Genital infections of  
87 chlamydia are associated with serious sequelae in the female reproductive tract such as  
88 tubal factor infertility (9). Chlamydiae are Gram-negative bacterial parasites that develop  
89 within a pathogen-specified membrane-bound organelle termed the inclusion (10).  
90 Chlamydial development is uniquely characterized by a biphasic interconversion of an  
91 infectious elementary body (EB) with a non-infectious, but replicative reticulate body  
92 (RB) (11). An obligate intracellular lifestyle has led to reductive genome evolution

93 across chlamydial species; Chlamydiae have retained genes uniquely required for their  
94 survival, but have become nutritionally dependent on their hosts by discarding many  
95 metabolism-related genes (12). Of note, *C. trachomatis* does not possess genes  
96 necessary for eliciting a stringent response to nutrient starvation (e.g. *relA*, *spoT*),  
97 suggesting that this pathogen may utilize novel mechanisms to respond to stress (13).

98         It is well established, however, that in response to various stressors, Chlamydiae  
99 deviate from their normal developmental program to initiate an aberrant developmental  
100 state, termed “persistence” (14). This persistent state is distinguished by the presence  
101 of viable, but non-cultivable, abnormally enlarged chlamydial organisms that display  
102 dysregulated gene expression. Importantly, *Chlamydia* can be reactivated from  
103 persistence by abatement of the stress condition. As such, chlamydial persistence at  
104 least superficially resembles a global stress response mechanism. Yet the molecular  
105 underpinnings of this phenotype are poorly understood, with most published studies  
106 focusing on the molecular and metabolic character of the aberrant, persistent form. It is  
107 therefore unclear to what extent primary stress responses contribute to the global  
108 persistent phenotype in *Chlamydia*.

109         The best described inducer of persistence is the pro-inflammatory cytokine  
110 interferon-gamma (IFN- $\gamma$ ). The bacteriostatic effect of IFN- $\gamma$  has been primarily  
111 attributed to host cell tryptophan (Trp) catabolism, for which *C. trachomatis* is  
112 auxotrophic (15–17). Following IFN- $\gamma$  stimulation, infected host cells up-regulate  
113 expression of indoleamine-2,3-dioxygenase (IDO1), which catabolizes Trp to *N*-  
114 formylkynurenine via cleavage of the indole ring (18). *C. trachomatis* cannot recycle  
115 kynurenines, unlike some other chlamydial species (19), and thus IFN- $\gamma$  stimulation

116 effectively results in Trp starvation to *C. trachomatis*. The primary response to Trp  
117 starvation in *C. trachomatis* is mediated by a TrpR ortholog, whose Trp-dependent  
118 binding to cognate promoter elements represses transcription (20, 21). This  
119 mechanism of regulatory control is presumably limited in *C. trachomatis*, as homologs of  
120 genes regulated by TrpR in other bacteria (e.g. *trpF*, *aroH*, *aroL*) have not been shown  
121 to respond to Trp limitation (22).

122 In many Gram-negative bacteria, such as *Escherichia coli*, *trpR* is monocistronic  
123 and distal to the Trp biosynthetic operon. In *C. trachomatis*, TrpR is encoded in an  
124 operon, *trpRBA*, which also contains the Trp synthase  $\alpha$ - and  $\beta$ - subunits (TrpA and  
125 TrpB, respectively), and possesses a 351 base-pair (bp) intergenic region (IGR) that  
126 separates *trpR* from *trpBA*. The functional significance of the *trpRBA* IGR is poorly  
127 characterized; while a putative operator sequence was identified overlapping an  
128 alternative transcriptional origin for *trpBA* (20), the IGR was not shown to be bound by  
129 TrpR (21). Based on *in silico* predictions, an attenuator sequence has been annotated  
130 within the *trpRBA* IGR (23), but this has not been thoroughly validated experimentally.  
131 Regardless, the IGR is more than 99% conserved at the nucleotide sequence level  
132 across ocular, genital and lymphogranuloma venereum (LGV) serovars of *C.*  
133 *trachomatis*, indicating functional importance (Fig. S1). Therefore, relative to other  
134 model bacteria, the regulation of the *trpRBA* operon remains poorly elucidated.

135 In evaluating alternative regulatory modes of the *trpRBA* operon, an interesting  
136 consideration is the pleiotropic effects induced by IFN- $\gamma$  stimulation of infected cells.  
137 IFN- $\gamma$  is involved in many processes that limit iron and other essential biometals to  
138 intracellular pathogens as a component of host nutritional immunity (5, 24). *Chlamydia*

139 have a strict iron dependence for normal development, evidenced by the onset of  
140 persistence following prolonged iron limitation (25). Importantly, *Chlamydia* presumably  
141 acquire iron via vesicular interactions between the chlamydial inclusion and slow-  
142 recycling transferrin (Tf)-containing endosomes (26). IFN- $\gamma$  is known to down-regulate  
143 transferrin receptor (TfR) expression in both monocytes and epithelial cells with  
144 replicative consequences for resident intracellular bacteria (27–30). However, iron  
145 homeostasis in *Chlamydia* is poorly understood, due to the lack of functionally  
146 characterized homologs to iron acquisition machinery that are highly conserved in other  
147 bacteria (31). Only one operon, represented by *ytgABCD*, has been clearly linked to iron  
148 acquisition. The periplasmic metal-binding protein YtgA displays a specific binding  
149 affinity for ferric iron over other divalent cations and likely transports iron from the outer  
150 membrane to an ABC-3 type inner membrane metal permease formed by the YtgBCD  
151 complex (32). Intriguingly, the YtgC (CTL0323) open reading frame (ORF) encodes a N-  
152 terminal permease domain fused to a C-terminal DtxR-like repressor domain, annotated  
153 YtgR (33, 34). YtgR is cleaved from the permease domain during infection and functions  
154 as an iron-dependent transcriptional repressor to autoregulate the expression of its own  
155 operon (34). YtgR represents the only identified iron-dependent transcriptional regulator  
156 in *Chlamydia*. Whether YtgR maintains a more diverse transcriptional regulon beyond  
157 the *ytgABCD* operon has not yet been addressed and remains an intriguing question in  
158 the context of immune-mediated iron limitation to *C. trachomatis*. Crucially,  
159 simultaneous IFN- $\gamma$ -mediated iron and Trp starvation raise the possibility that *C.*  
160 *trachomatis* could have evolved an integrated response to multiple stresses.

161 Consistent with the highly reduced capacity of the chlamydial genome, it is likely  
162 that *C. trachomatis* has a limited ability to tailor a specific response to each individual  
163 stress. In the absence of identifiable homologs for most global stress response  
164 regulators in *C. trachomatis*, we hypothesized that primary stress responses to  
165 pleiotropic insults may involve mechanisms of regulatory integration, whereby important  
166 molecular pathways are co-regulated by stress-responsive transcription factors such  
167 that they can be utilized across multiple stress conditions simultaneously induced by the  
168 host. Here, we report on the unique iron-dependent regulation of the *trpRBA* operon in  
169 *Chlamydia trachomatis*. We propose a model of iron-dependent transcriptional  
170 regulation of *trpRBA* mediated by the repressor YtgR binding specifically to the IGR,  
171 which may have implications for how *C. trachomatis* responds to immunological and  
172 environmental insults. Such a mechanism of iron-dependent regulation of Trp  
173 biosynthesis has not been previously described in any other prokaryote and adds to the  
174 catalog of regulatory models for Trp biosynthetic operons in bacteria. Further, it reveals  
175 a highly dynamic mode of regulatory integration within the *trpRBA* operon, exemplifying  
176 the importance of this pathway to chlamydial stress response.

## 177 **Results**

178 **Brief iron limitation via 2,2-bipyridyl treatment yields iron-starved, but non-**  
179 **persistent *Chlamydia trachomatis*.** To identify possible instances of regulatory  
180 integration between iron and Trp starvation in *C. trachomatis*, we optimized a stress  
181 response condition that preceded the development of a characteristically persistent  
182 phenotype. We reasoned that in order to effectively identify regulatory integration, we  
183 would need to investigate the bacterium under stressed, but not aberrant, growth



184 conditions such that we could distinguish primary stress responses from abnormal  
185 growth. To specifically investigate the possible contribution of iron limitation to a broader  
186 immunological (e.g. IFN- $\gamma$ -mediated) stress, we utilized the membrane-permeable iron  
187 chelator 2,2-bipyridyl (Bpdl), which has the advantage of rapidly and homogeneously  
188 starving *C. trachomatis* of iron (35). We chose to starve *C. trachomatis* serovar L2 of  
189 iron starting at 12 hrs post-infection (hpi), or roughly at the beginning of mid-cycle  
190 growth. At this point the chlamydial organisms represent a uniform population of  
191 replicative RBs that are fully competent, both transcriptionally and translationally, to  
192 respond to stress. We treated infected HeLa cell cultures with 100  $\mu$ M Bpdl or mock for  
193 either 6 or 12 hours (hrs) to determine a condition sufficient to limit iron to *C.*  
194 *trachomatis* without inducing hallmark persistent phenotypes. We stained infected cells  
195 seeded on glass coverslips with convalescent human sera and analyzed chlamydial  
196 inclusion morphology under both Bpdl- and mock-treated conditions by laser point-  
197 scanning confocal microscopy (Fig. 1A). Following 6 hrs of Bpdl treatment, chlamydial  
198 inclusions were largely indistinguishable from mock-treated inclusions, containing a  
199 homogeneous population of larger organisms, consistent with RBs in mid-cycle growth.  
200 However, by 12 hrs of Bpdl treatment, the inclusions began to display signs of aberrant  
201 growth: they were perceptibly smaller, more comparable in size to 18 hpi, and contained  
202 noticeably fewer organisms, perhaps indicating a delay in RB-to-EB differentiation.  
203 These observations were consistent with our subsequent analysis of genome replication  
204 by quantitative PCR (qPCR; Fig. 1B.) At 6 hrs of Bpdl treatment, there was no  
205 statistically distinguishable difference in genome copy number when compared to the  
206 equivalent mock-treated time-point. However, by 12 hrs of treatment, genome copy

207 number was significantly reduced 4.7-fold in the Bpdl-treated group relative to mock-  
208 treatment ( $p = 0.0033$ ). We then assayed the transcript expression of two markers for  
209 persistence by reverse transcription quantitative PCR (RT-qPCR): the early gene *euo*,  
210 encoding a transcriptional repressor of late-cycle genes (Fig.1C), and the adhesin  
211 *omcB*, which is expressed late in the developmental cycle (Fig. 1D). Characteristic  
212 persistence would feature sustained high *euo* expression late into infection, and  
213 suppressed *omcB* expression throughout development. We observed that at 6 hrs of  
214 Bpdl treatment, there was no statistically distinguishable difference in either *euo* or  
215 *omcB* expression when compared to the mock-treatment. Still at 12 hrs of Bpdl  
216 treatment, *euo* expression was unchanged. However, *omcB* expression was  
217 significantly induced following 12 hrs of Bpdl-treatment ( $p = 0.00015$ ). This was  
218 unexpected, but we note that *omcB* expression has been shown to vary between  
219 chlamydial serovars and species when starved for iron (31). Collectively, these data  
220 indicated that 6 hrs of Bpdl treatment was a more suitable time-point at which to monitor  
221 iron-limited stress responses.

222 We additionally assayed these same metrics following 6 or 12 hrs of Trp  
223 starvation by culturing cells in either Trp-replete or Trp-deplete DMEM-F12 media  
224 supplemented with fetal bovine serum (FBS) pre-dialyzed to remove amino acids. We  
225 observed no discernable change in inclusion morphology out to 12 hrs of Trp starvation  
226 (Fig. S2A), but genome copy numbers were significantly reduced 2.7-fold at this time-  
227 point ( $p = 0.00612$ ; Fig. S2B). The transcript expression of *euo* (Fig. S2C) and *omcB*  
228 (Fig. S2D) did not significantly change at either treatment duration, but Trp-depletion did  
229 result in a 2.0-fold reduction in *omcB* expression, consistent with a more characteristic

230 persistent phenotype. These data therefore also indicated that 6 hrs of treatment would  
231 be ideal to monitor non-persistent responses to Trp limitation.

232 We next sought to determine whether our brief 6-hr Bpdl treatment was sufficient  
233 to elicit a transcriptional iron starvation phenotype. We chose to analyze the expression  
234 of three previously identified iron-regulated transcripts, *ytgA* (Fig. 2A), *ahpC* (Fig. 2B)  
235 and *devB* (Fig. 2C), by RT-qPCR under Bpdl- and mock-treated conditions (35, 36). In  
236 addition, we analyzed the expression of one non-iron-regulated transcript, *dnaB* (Fig.  
237 2D), as a negative control (37). Following 6 hrs of Bpdl treatment, we observed that the  
238 transcript expression of the periplasmic iron-binding protein *ytgA* was significantly  
239 elevated 1.75-fold relative to the equivalent mock-treated time-point ( $p = 0.0052$ ).  
240 However, we did not observe induction of *ytgA* transcript expression relative to the 12  
241 hpi time-point. We distinguish here between *elevated* and *induced* transcript expression,  
242 as chlamydial gene expression is highly developmentally regulated. Thus, it can be  
243 more informative to monitor longitudinal expression of genes, *i.e.* their induction, as  
244 opposed to elevation relative to an equivalent control time-point, which may simply  
245 represent a stall in development. While we did not observe induction of *ytgA*, which  
246 would be more consistent with an iron-starved phenotype, we reason that this is a  
247 consequence of the brief treatment period, and that longer iron starvation would  
248 produce a more robust induction of iron-regulated transcripts. Note that the identification  
249 of *ytgA* as iron-regulated has only been previously observed following extended periods  
250 of iron chelation (32, 35, 38). Similarly, we observed that the transcript expression of the  
251 thioredoxin *ahpC* was significantly elevated 2.15-fold relative to the equivalent mock-  
252 treated time-point ( $p = 0.038$ ) but was not induced relative to the 12 hpi time-point. The

253 transcript expression of *devB*, encoding a 6-phosphogluconolactonase involved in the  
254 pentose phosphate pathway, was not observed to significantly respond to our brief iron  
255 limitation condition, suggesting that it is not a component of the primary iron starvation  
256 stress response in *C. trachomatis*. As expected, the transcript expression of *dnaB*, a  
257 replicative DNA helicase, was not altered by our iron starvation condition, consistent  
258 with its presumably iron-independent regulation (37). Overall, these data confirmed that  
259 our 6-hr Bpdl treatment condition was suitable to produce a mild iron starvation  
260 phenotype at the transcriptional level, thus facilitating our investigation of iron-  
261 dependent regulatory integration.

262 **Transcript expression of the *trpRBA* operon is differentially regulated by iron in**  
263 ***Chlamydia trachomatis*.** Upon identifying an iron limitation condition that produced a  
264 relevant transcriptional phenotype while avoiding the onset of persistent development,  
265 we aimed to investigate whether the immediate response to iron starvation in *C.*  
266 *trachomatis* would result in the consistent induction of pathways unrelated to iron  
267 utilization/acquisition, but nevertheless important for surviving immunological stress.  
268 The truncated Trp biosynthetic operon, *trpRBA* (Fig. 3A), has been repeatedly linked to  
269 the ability of genital and LGV serovars (D-K and L1-3, respectively) of *C. trachomatis* to  
270 counter IFN- $\gamma$ -mediated stress. This is due to the capacity of the chlamydial Trp  
271 synthase in these serovars to catalyze the  $\beta$  synthase reaction, *i.e.* the condensation of  
272 indole to the amino acid serine to form Trp (17). In the presence of exogenous indole,  
273 *C. trachomatis* is therefore able to biosynthesize Trp such that it can prevent the  
274 development of IFN- $\gamma$ -mediated persistence. Correspondingly, the expression of *trpRBA*  
275 is highly induced following IFN- $\gamma$  stimulation of infected cells (39, 40). These data have

276 historically implicated Trp starvation as the primary mechanism by which persistence  
277 develops in *C. trachomatis* following exposure to IFN- $\gamma$ . However, these studies have  
278 routinely depended on prolonged treatment conditions that monitor the terminal effect of  
279 persistent development, as opposed to the immediate molecular events which may  
280 have important roles in the developmental fate of *Chlamydia*. As such, these studies  
281 may have missed the contribution of other IFN- $\gamma$ -stimulated insults such as iron  
282 limitation.

283 To decouple Trp limitation from iron limitation and assess their relative  
284 contribution to regulating a critical pathway for responding to IFN- $\gamma$ -mediated stress, we  
285 monitored the transcript expression of the *trpRBA* operon under brief Trp or iron  
286 starvation by RT-qPCR. When starved for Trp for 6 hrs, we observed that the  
287 expression of *trpR*, *trpB* and *trpA* were all significantly induced greater than 10.5-fold  
288 relative to 12 hpi ( $p = 0.00077$ ,  $0.025$  and  $9.7e-5$ , respectively; Fig. 3B). All three ORFs  
289 were also significantly elevated relative to the equivalent mock-treated time-point ( $p =$   
290  $0.00076$ ,  $0.025$  and  $9.7e-5$ , respectively). This result was surprising with respect to the  
291 relative immediacy of operon induction in response to our Trp starvation protocol,  
292 confirming the relevant Trp-starved transcriptional phenotype. To induce Trp-deprived  
293 persistence in *C. trachomatis*, many laboratories rely on compounded techniques of  
294 IFN- $\gamma$  pre-treatment to deplete host Trp pools in conjunction with culturing in Trp-  
295 depleted media, among other strategies. While the phenotypic end-point differs here, it  
296 is nonetheless interesting to note that only 6 hrs of media replacement is sufficient to  
297 markedly up-regulate *trpRBA* expression. This suggests that *C. trachomatis* has a  
298 highly attuned sensitivity to even moderate changes in Trp levels.

299 We next performed the same RT-qPCR analysis on the expression of the *trpRBA*  
300 operon in response to 6 hrs of iron limitation via Bpdl treatment (Fig. 3C). While we  
301 observed that the transcript expression of all three ORFs was significantly elevated at  
302 least 2.1-fold relative to the equivalent mock-treated time-point ( $p = 0.015$ ,  $0.00098$  and  
303  $0.0062$ , respectively), we made the intriguing observation that only the expression *trpB*  
304 and *trpA* was significantly induced relative to 12 hpi ( $p = 0.00383$  and  $0.0195$ ,  
305 respectively). The significant induction of *trpBA* expression, but not *trpR* expression,  
306 suggested that *trpBA* are specifically regulated by iron availability. This result is  
307 consistent with a recent survey of the iron-regulated transcriptome in *C. trachomatis* by  
308 RNA sequencing, which also reported that iron-starved *Chlamydia* specifically up-  
309 regulate *trpBA* expression in the absence of altered *trpR* expression (37). Our results  
310 expand on this finding by providing a more detailed investigation into the specific profile  
311 of this differential regulation of *trpRBA* in response to iron deprivation. Taken together,  
312 these findings demonstrated that an important stress response pathway, the *trpRBA*  
313 operon, is regulated by the availability of both Trp and iron, consistent with the notion  
314 that the pathway may be cooperatively regulated to respond to various stress  
315 conditions. Notably, iron-dependent regulation of Trp biosynthesis has not been  
316 previously documented in other prokaryotes.

317 **Specific iron-regulated expression of *trpBA* originates from a novel alternative**  
318 **transcriptional start site within the *trpRBA* intergenic region.** We hypothesized that  
319 the specific iron-related induction of *trpBA* expression relative to *trpR* expression may  
320 be attributable to an iron-regulated alternative transcriptional start site (alt. TSS)  
321 downstream of the *trpR* ORF. Indeed, a previous study reported the presence of an alt.

322 TSS in the *trpRBA* IGR, located 214 nucleotides upstream of the *trpB* translation start  
323 position (20). However, a parallel study could not identify a TrpR binding site in the  
324 *trpRBA* IGR (21). We reasoned that a similar alt. TSS may exist in the IGR that  
325 controlled the iron-dependent expression of *trpBA*. We therefore performed Rapid  
326 Amplification of 5'-cDNA Ends (5'-RACE) on RNA isolated from *C. trachomatis* L2-  
327 infected HeLa cells using the SMARTer 5'/3' RACE Kit workflow (Takara Bio). Given the  
328 low expression of the *trpRBA* operon during normal development, we utilized two  
329 sequential gene-specific amplification steps (nested 5'-RACE) to identify 5' cDNA ends  
330 in the *trpRBA* operon. These nested RACE conditions resulted in amplification that was  
331 specific to infected-cells (Fig. S3A). Using this approach, we analyzed four conditions:  
332 12 hpi, 18 hpi, 12 hpi + 6 hrs of Bpdl treatment, and 12 hpi + 6 hrs of Trp-depletion (Fig.  
333 4A). We observed three RACE products that migrated with an apparent size of 1.5, 1.1  
334 and 1.0 kilobases (kb). At 12 and 18 hpi, all three RACE products exhibited low  
335 abundance, even following the nested PCR amplification. This observation was  
336 consistent with the expectation that the expression of the *trpRBA* operon is very low  
337 under normal, iron and Trp-replete conditions. However, we note that the 6-hr difference  
338 in development did appear to alter the representation of the 5' cDNA ends, which may  
339 suggest a stage-specific promoter utilization within the *trpRBA* operon. In our Trp  
340 starvation condition, we observed an apparent increase in the abundance of the 1.5 kb  
341 RACE product, which was therefore presumed to represent the primary TSS upstream  
342 of *trpR*, at nucleotide position 511,389 (*C. trachomatis* L2 434/Bu). Interestingly, the 1.0  
343 kb product displayed a very similar apparent enrichment following Bpdl treatment,  
344 suggesting that this RACE product represented a specifically iron-regulated TSS. Both

345 the 1.5 and 1.0 kb RACE products were detectable in the Trp-depleted and iron-  
346 depleted conditions, respectively, during the primary RACE amplification, consistent  
347 with their induction under these conditions (Fig. S3B).

348 If iron depletion was inducing *trpBA* expression independent of *trpR*, we  
349 reasoned that we would observe specific enrichment of *trpB* sequences in our 5'-RACE  
350 cDNA samples relative to *trpR* sequences. We again utilized RT-qPCR to quantify the  
351 abundance of *trpB* transcripts relative to *trpR* transcripts in the 5'-RACE cDNA samples  
352 (Fig. 4B). In agreement with our model, only under iron starved conditions did we  
353 observe a significant enrichment of *trpB* relative to *trpR* ( $p < 0.01$ ). Additionally, we  
354 observed that at 12 and 18 hpi in iron-replete conditions, the ratio of *trpB* to *trpR* was  
355 approximately 1.0, suggesting non-preferential basal expression across the three  
356 putative TSSs. Another factor contributing to this ratio is the synthesis of the full-length  
357 *trpRBA* polycistron. In support of this, the *trpB* to *trpR* ratio remained near 1.0 under the  
358 Trp-starved condition, which would be expected during transcription read-through of the  
359 whole operon. The apparent lack of preferential promoter utilization as described above  
360 could be attributed to the relatively low basal expression of the operon at 12 and 18 hpi  
361 under Trp- and iron-replete conditions, thus precluding quantitative detection of  
362 differential promoter utilization in this assay.

363 To determine the specific location of the 5' cDNA ends within the *trpRBA* operon,  
364 we isolated the 5'-RACE products across all conditions by gel extraction and cloned the  
365 products into the pRACE vector supplied by the manufacturer. We then sequenced the  
366 ligated inserts and BLASTed the sequences against the *C. trachomatis* L2 434/Bu  
367 genome to identify the location of the 5'-most nucleotides (Fig. 4C). These data are



368 displayed as a statistical approximation of the genomic regions most likely to be  
369 represented by the respective 5'-RACE products in both histogram (semi-continuous)  
370 and density plot (continuous) format (See Dataset S1 for a description of all mapped 5'-  
371 RACE products). As expected, the 1.5 kb product mapped in a distinct and tightly  
372 grouped peak near the previously annotated *trpR* TSS, with the mean and modal  
373 nucleotide being 511,388 and 511,389, respectively (Fig. S4A). Surprisingly, we found  
374 that neither the 1.1 or 1.0 kb RACE product mapped to the previously reported alt. TSS  
375 in the *trpRBA* IGR, at position 511,826. Instead, we observed that the 1.1 kb product  
376 mapped on average to nucleotide position 511,878, with the modal nucleotide being  
377 found at 511,898 (Fig. S4B). The 1.0 kb product mapped with a mean nucleotide  
378 position of 512,013, with the modal nucleotide being 512,005 (Fig. S4C), only 35 bases  
379 upstream of the *trpB* coding sequence. Interestingly, the 1.0 kb product mapped to a  
380 region of the *trpRBA* IGR flanked by consensus  $\sigma^{66}$  -10 and -35 promoter elements,  
381 found at positions 512,020-5 and 511,992-7, respectively (41). These data collectively  
382 pointed toward the 1.0 kb 5'-RACE product representing a novel, iron-regulated alt. TSS  
383 and *bona fide*  $\sigma^{66}$ -dependent promoter element that allows for the specific iron-  
384 dependent expression of *trpBA*.

385 **YtgR specifically binds to the *trpRBA* intergenic region in an operator-dependent**  
386 **manner to repress transcription of *trpBA*.** As the only known iron-dependent  
387 transcriptional regulator in *Chlamydia*, we hypothesized that YtgR may regulate the iron-  
388 dependent expression of *trpBA* from the putative promoter element we characterized by  
389 5'-RACE. Using bioinformatic sequence analysis, we investigated whether the *trpRBA*  
390 IGR contained a candidate YtgR operator sequence. By local sequence alignment of

391 the putative YtgR operator sequence (33) and the *trpRBA* IGR, we identified a high-  
392 identity alignment (76.9% identity) covering 67% of the putative operator sequence (Fig.  
393 5A). Interestingly, this alignment mapped to the previously identified palindrome  
394 suspected to have operator functionality (20). By global sequence alignment of the YtgR  
395 operator to the palindromic sequence, an alignment identical to the local alignment was  
396 observed, which still displayed relatively high sequence identity (43.5% identity). We  
397 hypothesized that this sequence functioned as an YtgR operator, despite being located  
398 184 bp upstream of the *trpBA* alt. TSS.

399 To investigate the ability of YtgR to bind and repress transcription from the  
400 putative *trpBA* promoter, we implemented a heterologous two-plasmid assay that  
401 reports on YtgR repressor activity as a function of  $\beta$ -galactosidase expression (14). In  
402 brief, a candidate DNA promoter element was cloned into the pCCT expression vector  
403 between an arabinose-inducible pBAD promoter and the reporter gene *lacZ*. This  
404 plasmid was co-transformed into BL21 (DE3) *E. coli* along with an IPTG-inducible  
405 pET151 expression vector with (pET151-YtgR) or without (pET151-EV) the C-terminal  
406 139 amino acid residues of CTL0323 (YtgC). Note that we have previously  
407 demonstrated that this region is a functional iron-dependent repressor domain (34). To  
408 verify the functionality of this assay, we determined whether ectopic YtgR expression  
409 could repress pCCT reporter gene expression in the presence of three candidate DNA  
410 elements: a no-insert empty vector (pCCT-EV), the putative promoter element for *C.*  
411 *trachomatis* *lpdA* (pCCT-*lpdA*), and the promoter region of the *ytgABCD* operon (pCCT-  
412 *ytgABCD*; Fig. 5B). As expected, from the pCCT-EV reporter construct, ectopic YtgR  
413 expression did not significantly reduce the activity of  $\beta$ -galactosidase. Additionally,

414 reporter gene expression from pCCT-*lpdA*, containing the promoter of iron-regulated  
415 *lpdA* (37), which is not known to be YtgR-regulated, was not affected by ectopic  
416 expression of YtgR. This demonstrated that the assay can discriminate between the  
417 promoter elements of iron-regulated genes and *bona fide* YtgR targeted promoters.  
418 Indeed, in the presence of pCCT-*ytgABCD*, induction of YtgR expression produced a  
419 significant decrease in  $\beta$ -galactosidase activity ( $p = 0.03868$ ) consistent with its  
420 previously reported auto-regulation of this promoter (34).

421         Using this same assay, we then inserted into the pCCT reporter plasmid 1) the  
422 *trpR* promoter element (pCCT-*trpR*), 2) the putative *trpBA* promoter element  
423 represented by the IGR (pCCT-*trpBA*), and 3) the same putative *trpBA* promoter  
424 element with a mutated YtgR operator sequence that was diminished for both  
425 palindromicity and A-T richness, two typical features of prokaryotic promoter elements  
426 (pCCT-*trpBA* $\Delta$ Operator; Fig. 5C) (42, 43). When YtgR was ectopically expressed in the  
427 pCCT-*trpR* background, we observed no statistically distinguishable change in  $\beta$ -  
428 galactosidase activity. However, in the pCCT-*trpBA* background, ectopic YtgR  
429 expression significantly reduced  $\beta$ -galactosidase activity at levels similar to those  
430 observed in the pCCT-*ytgABCD* background ( $p = 0.01219$ ). This suggested that YtgR  
431 was capable of binding to the *trpBA* promoter element specifically. Interestingly, this  
432 repression phenotype was abrogated in the pCCT-*trpBA* $\Delta$ Operator background, where  
433 we observed no statistically meaningful difference in  $\beta$ -galactosidase activity. We  
434 subsequently addressed whether the region of the *trpRBA* IGR containing the YtgR  
435 operator site was sufficient to confer YtgR repression in this assay (Fig. S5). Therefore,  
436 we cloned three fragments of the *trpRBA* IGR into the pCCT reporter plasmid: the first

437 fragment represented the 5'-end of the IGR containing the operator site at the 3'-end  
438 (pCCT-IGR1), the second fragment represented a central region of the IGR containing  
439 the operator site at the 5'-end (pCCT-IGR2), and the third fragment represented the 3'-  
440 end of the IGR and did not contain the operator site (pCCT-IGR3). Surprisingly, we  
441 observed that none of these fragments alone were capable of producing a significant  
442 repression phenotype in our reporter system. This finding indicated that while the  
443 operator site was necessary for YtgR repression, it alone was not sufficient. Together,  
444 these data indicated that YtgR could bind to the *trpBA* promoter element and that this  
445 binding was dependent upon an intact AT-rich palindromic sequence, likely representing  
446 an YtgR operator, but that further structural elements in the *trpRBA* IGR may be  
447 necessary for repression. Nonetheless, we demonstrated the existence of a functional  
448 YtgR binding site that conferred iron-dependent transcriptional regulation to *trpBA*,  
449 independent of the major *trpR* promoter.

450 **Iron limitation promotes transcription read-through at the *trpRBA* YtgR operator**  
451 **site.** If YtgR binds to the operator sequence within the intergenic region under iron-  
452 replete conditions, does it influence RNA polymerase (RNAP) read-through from the  
453 major *trpR* promoter to synthesize the polycistronic *trpRBA* mRNA? We hypothesized  
454 that the presence of YtgR at the *trpRBA* operator may disadvantage the processivity of  
455 RNAP initiating transcription at the upstream *trpR* promoter. Similar systems of RNAP  
456 read-through blockage have been reported; the transcription factor Reb1p “roadblocks”  
457 RNAPII transcription read-through in yeast by a mechanism of RNAP pausing and  
458 subsequent labelling for degradation (44). To investigate this question, we first identified  
459 transcription termination sites (TTSs) in the *trpRBA* operon in *C. trachomatis*. We

460 utilized 3'-RACE to map the 3'-ends of transcripts using gene-specific primers within the  
461 *trpR* CDS (Fig. 6A; bottom). We again utilized two RACE amplification cycles to  
462 generate distinct, specific bands suitable for isolation and sequencing (Fig. S6B-C). By  
463 gel electrophoresis of the 3'-RACE products, we observed the appearance of four  
464 distinct bands that migrated with an apparent size of 0.55, 0.45, 0.40 and 0.20 kb. In our  
465 Trp-depleted condition, we observed only a very weak amplification of the 2.5 – 3 kb  
466 full-length *trpRBA* message by 3'-RACE (Fig. S6A). However, we did observe it across  
467 all replicates. To confirm that the full-length product was relatively specific to the Trp-  
468 deplete treatment, we amplified the *trpRBA* operon by RT-PCR from the 3'-RACE cDNA  
469 (Fig. 6A; top). As expected, only in the Trp-deplete sample did we observe robust  
470 amplification of the full-length *trpRBA* message. We note however that image contrast  
471 adjustment reveals a very weak band present in all experimental samples.

472 To identify the specific TTS locations, we gel extracted the four distinct 3'-RACE  
473 bands across all conditions and cloned them into the pRACE sequencing vector as was  
474 done for the 5'-RACE experiments. We then sequenced the inserted RACE products  
475 and mapped them to the *C. trachomatis* L2 434/Bu genome (Fig. 6B). This revealed a  
476 highly dynamic TTS landscape contained almost exclusively within the *trpRBA* IGR,  
477 which has not previously been investigated (For a full description of mapped 3'-RACE  
478 products, see Dataset S2). The 0.20 kb RACE product mapped tightly to the 3'-end of  
479 the *trpR* CDS, with a mean nucleotide position of 511,665 and a modal nucleotide  
480 position of 511,667 (Fig. S7A). Contrastingly, the other three RACE products did not  
481 map in such a way so as to produce specific, unambiguous modal peaks. Instead, their  
482 distribution was broader and more even, with only a few nucleotide positions mapping

483 more than once. Accordingly, the 0.45 kb product mapped with an average nucleotide  
484 position of 511,889, just downstream of the 1.1 kb 5'-RACE product (Fig. S7C), while  
485 the 0.55 kb product mapped with an average nucleotide position of 511,986, upstream  
486 of the 1.0 kb 5'-RACE product (Fig. S7D). Interestingly, the 0.40 kb product mapped to  
487 a region directly overlapping the putative YtgR operator site, with a mean nucleotide  
488 position of 511,811 (Fig. S7B). We therefore reasoned that this putative TTS may have  
489 an iron-dependent function.

490 We next aimed to quantitatively analyze the possibility that iron-depletion, and  
491 thus dissociation of YtgR from this region, may facilitate transcription read-through at  
492 the operator site. Working from the 3'-RACE generated cDNAs, we utilized RT-qPCR to  
493 monitor the abundance of various amplicons across the *trpRBA* operon in relation to a  
494 “read-through” normalization amplicon that should only be represented when the full-  
495 length *trpRBA* message is transcribed (Fig. 6C). Therefore, as each amplicon is  
496 increasingly represented as a portion of the full-length, read-through transcript, the  
497 representation ratio of the specific amplicon to the normalization amplicon should  
498 approach 1.0. We first analyzed an amplicon from nucleotide 511,416 – 531 to monitor  
499 transcript species associated with transcription initiating at the *trpR* promoter. We  
500 observed that the representation of this amplicon was not significantly altered following  
501 iron limitation relative to 12 hpi, suggesting that the depletion of iron was not affecting  
502 initiation of transcription at the *trpR* promoter. Interestingly, at 18 hpi, the representation  
503 ratio of this amplicon significantly shifted further away from 1.0 ( $p = 0.00358$ ), indicating  
504 that at 18 hpi this amplicon is represented less as a component of read-through  
505 transcription relative to 12 hpi. As expected, under Trp-deplete conditions, the

506 representation ratio shifted significantly closer to 1.0 ( $p = 0.00064$ ), consistent with read-  
507 through transcription of the full-length *trpRBA* message.

508 We then performed the same analysis on an amplicon from nucleotide 511,639 –  
509 764, immediately upstream of the TTS at the YtgR operator site. We again observed  
510 that at 18 hpi, the representation ratio was significantly increased ( $p = 0.01046$ ), and  
511 following Trp-depletion, the ratio was significantly decreased ( $p = 0.00023$ ), as  
512 expected. Notably, and consistent with our hypothesis, we observed that the  
513 representation ratio of this amplicon was also significantly closer to 1.0 following iron  
514 limitation ( $p = 0.00407$ ), suggesting that transcription read-through was increased at this  
515 site under iron limited conditions. If YtgR is dissociating from the operator site during  
516 iron depletion, a greater proportion of transcripts would be expected to read-through this  
517 locus.

518 Finally, we analyzed an amplicon from nucleotide 513,856 – 968, at the very 3'-end of  
519 *trpA* to monitor terminal transcription under our experimental conditions. At 18 hpi, we  
520 observed a significant increase in the representation ratio of this amplicon ( $p =$   
521  $0.00476$ ), which is likely attributable to both basal levels of alternative transcription from  
522 the IGR as well as poor transcription read-through of the full-length message. Following  
523 6 hrs of Bpdl treatment, we also observed a significant increase in the representation  
524 ratio of this amplicon ( $p = 0.01510$ ), which supports the finding that *trpBA* is being  
525 preferentially transcribed under this condition, distinct from the full-length *trpRBA*  
526 transcript. We were only able to detect a marginal decrease in the representation of this  
527 amplicon under Trp-depleted conditions ( $p = 0.07942$ ), which may suggest that the very  
528 3'-end of *trpRBA* is relatively under-represented than our normalization amplicon, which

529 falls within the middle of the operon. In fact, recent work has reported on the relatively  
530 poor representation of 3'-end mRNAs in *Chlamydia* (45). In sum, this set of experiments  
531 provides evidence that iron-depletion specifically alters the representation of particular  
532 mRNA species across the *trpRBA* operon. Additionally, they implicate iron-dependent  
533 YtgR DNA-binding as the mediator of these effects. By alleviating YtgR repression via  
534 iron depletion, transcription is allowed to proceed through the operator site, albeit at  
535 basal levels. Concomitantly, transcription is specifically activated at the downstream alt.  
536 TSS for *trpBA*.

## 537 **Discussion**

538 In this study, we report a mechanism of stress adaptation that integrates  
539 responses to iron and Trp starvation. Specifically, we demonstrated that the *trpRBA*  
540 operon is transcriptionally regulated by the iron-dependent repressor YtgR. We  
541 determined that iron-dependent expression of *trpBA* initiates from a novel internal  
542 promoter in an IGR of the *trpRBA* operon and that this IGR also contains an YtgR  
543 operator site necessary to confer a transcriptional repression phenotype. We suggest  
544 that the dual promoter configuration of *trpRBA* presents the opportunity for YtgR to  
545 block transcription read-through from the *trpR* promoter; transcripts terminate at the  
546 YtgR operator site and iron depletion facilitates read-through of the operon at this locus.  
547 This is the first time an iron-dependent mode of regulation has been shown to control  
548 the expression of tryptophan biosynthesis in prokaryotes, which is a reflection of the  
549 uniquely specialized nature of *C. trachomatis*.

550 The distance separating the YtgR operator site from the *trpBA* alt. TSS indicate  
551 the involvement of a regulatory mechanism more complex than simple steric hindrance



552 of RNAP by YtgR. One possible explanation is that YtgR functions similarly to other  
553 prokaryotic transcription factors that repress “at a distance” by a mechanism of DNA-  
554 bending (46, 47). In this scenario, YtgR binding simultaneously to an additional operator  
555 site may facilitate a conformational bend in the double-helix DNA such that RNAP no  
556 longer has access to the alternative *trpBA* promoter site. This would be consistent with  
557 the observation that a truncated *trpRBA* IGR containing the candidate YtgR operator is  
558 insufficient to confer transcriptional repression. The topological alteration induced by  
559 DNA-bending could also feasibly contribute to diminished RNAP read-through from the  
560 *trpR* promoter. *In silico* identification of additional putative YtgR operator sites was  
561 unsuccessful, which could be due to the lack of enough validated binding sites to  
562 generate a robust consensus sequence. Thus, a more unbiased approach (e.g. ChIP-  
563 Sequencing) will be required to identify additional YtgR binding events. We also note  
564 that the YtgR operator upstream of *ytgA*, while only 21 bp from the predicted -35  
565 element, rests within a 660-bp IGR, raising the possibility that other cryptic YtgR  
566 operators are present in this sequence. Another possibility is that YtgR functions in  
567 concert with additional transcription factors more proximal to the *trpBA* promoter  
568 elements. In *E. coli*, the repressor Fis binds 135 bp upstream of the *nir* promoter TSS,  
569 controlling co-activation of *nir* expression by proximally-bound Fnr and NarL/NarP (48).  
570 While we have no evidence to suggest other transcription factors are controlling *trpBA*  
571 expression, this does not preclude the possibility of their involvement.

572 While we demonstrate here that iron-dependent *trpBA* expression originates from  
573 a novel promoter element immediately upstream of the *trpB* CDS, this is not the first  
574 description of an alt. TSS within the *trpRBA* IGR. Carlson, et al. identified an alt. TSS

575 within the IGR which they suggested was responsible for *trpBA* expression (20).  
576 Interestingly, this TSS was observed to originate from within the palindromic sequence  
577 that we have identified here as a functional YtgR operator site. In these studies, we  
578 were unable to confirm the presence of the previously identified alt. TSS by 5'-RACE.  
579 This is likely because Carlson, et al. examined the presence of transcript origins  
580 following 24 hrs of Trp starvation whereas here we monitored immediate responses to  
581 stress following only 6 hrs of treatment. Prolonged Trp depletion would result in a more  
582 homogeneously stressed population of chlamydial organisms that may exhibit the same  
583 preferential utilization of the promoter identified by Carlson, et al. Population  
584 heterogeneity in response to brief stress may explain the observation of multiple  
585 T(S/T)Ss across the *trpRBA* operon in our studies. However, the contribution of such a  
586 Trp-dependent alt. TSS to the general stress response of *C. trachomatis* remains  
587 unclear. Akers & Tan were unable to verify TrpR binding to the *trpRBA* IGR by EMSA,  
588 suggesting that some other Trp-dependent mechanism may control transcription from  
589 this site (21). Ultimately, our approach of investigating more immediate responses to  
590 stress revealed previously unreported mechanisms functioning to regulate Trp  
591 biosynthesis in *C. trachomatis*, underscoring the value of transient as opposed to  
592 sustained induction of stress.

593 Another mechanism of regulation reported to control the chlamydial *trpRBA*  
594 operon is Trp-dependent transcription attenuation. Based on sequence analysis, a  
595 leader peptide has been annotated within the *trpRBA* IGR (23). Presumably, this  
596 functions analogously to the attenuator in the *E. coli trpEDCBA* operon; Trp starvation  
597 causes ribosome stalling at sites of enriched Trp codons such that specific RNA

598 secondary structures form to facilitate RNAP read-thru of downstream sequences – in  
599 this case, *trpBA* (49). However, robust experimental evidence to support the existence  
600 of attenuation in *C. trachomatis* is lacking. To date, the only experimental evidence that  
601 supports this model was reported by Carlson, et al., who demonstrated that transcript  
602 expression of *trpBA* is increased following 24 hr Trp-depletion in a *trpR*-mutant strain of  
603 *C. trachomatis*, suggesting that an additional level of Trp-dependent regulation controls  
604 *trpBA* expression (20). However, this could be attributable to an alternative Trp-  
605 dependent mechanism controlling *trpBA* expression at the alt. TSS identified by  
606 Carlson, et al. None of the data presented here point conclusively to the existence of a  
607 Trp-dependent attenuator; while we acknowledge that the additional termination sites  
608 identified in our 3'-RACE assay may represent termination events mediated by an  
609 attenuator, without more specific analysis utilizing mutated sequences we cannot draw  
610 definitive conclusions about the functional relevance of those termination sites.  
611 Additionally, it is unlikely that we would be able to observe Trp-dependent attenuation  
612 under our brief stress conditions given that attenuation has a much higher tolerance for  
613 Trp-depletion than TrpR-mediated transcriptional repression in *E. coli* (50).

614 Interestingly, in *Bacillus subtilis*, Trp-dependent attenuation of transcription takes  
615 on a form markedly different from that in *E. coli*. Whereas attenuation functions in *cis* for  
616 the *E. coli* *trp* operon, *B. subtilis* utilize a multimeric Tryptophan-activated RNA-binding  
617 Attenuation Protein, TRAP, which functions in *trans* to bind *trp* operon RNA under Trp-  
618 replete conditions, promoting transcription termination and inhibiting translation (51).  
619 This interaction is antagonized by anti-TRAP in the absence of charged tRNA<sup>Trp</sup>, leading  
620 to increased expression of TRAP regulated genes. We suggest that YtgR may

621 represent the first instance of a separate and distinct clade of attenuation mechanisms:  
622 iron-dependent *trans*-attenuation. We have demonstrated that transcription terminates  
623 in the *trpRBA* operon at the YtgR operator site, and that read-thru of the operon is  
624 facilitated under iron-deplete conditions, which is consistent with the idea that relief of  
625 iron-activated YtgR DNA-binding at this site would permit RNAP to pass through the  
626 YtgR operator site. This mechanism may function independently of specific RNA  
627 secondary structure, relying instead on steric blockage of RNAP processivity, but  
628 ultimately producing a similar result. Possible regulation of translation remains to be  
629 explored. The recent development of new genetic tools to alter chromosomal  
630 sequences and generate conditional knockouts in *C. trachomatis* should enable a more  
631 detailed analysis of *trpRBA* regulation, including possible *trans*-attenuation (52, 53).

632         As a Trp auxotroph, what might be the biological significance of iron-dependent  
633 YtgR regulation of the *trpRBA* operon in *C. trachomatis*? We have already noted the  
634 possibility that iron-dependent *trpBA* regulation in *C. trachomatis* may enable a  
635 response to simultaneous Trp and iron starvation, such as that likely mediated by IFN- $\gamma$ .  
636 However, this mechanism also presents the opportunity for *C. trachomatis* to respond  
637 similarly to distinct *sequential* stresses, where a particular stress primes the pathogen to  
638 better cope with subsequent stresses. To reach the female upper genital tract (UGT),  
639 where most significant pathology is identified following infection with *C. trachomatis*, the  
640 pathogen must first navigate the lower genital tract (LGT). *Chlamydia* infections of the  
641 female LGT are associated with bacterial vaginosis (BV), which is characterized by  
642 obligate and facultative anaerobe colonization, some of which catalyze the production of  
643 indole (54, 55). This provides *C. trachomatis* with the necessary substrate to salvage

644 tryptophan via TrpBA. Interestingly, the LGT is also likely an iron-limited environment.  
645 Pathogen colonization and BV both increase the concentration of mucosal lactoferrin  
646 (Lf), an iron-binding glycoprotein, which can starve pathogens for iron (56, 57). Lf  
647 expression is additionally hormone-regulated, and thus the LGT may normally  
648 experience periods of iron limitation (58, 59). Moreover, the expression of TfR is  
649 constrained to the basal cells of the LGT stratified squamous epithelium (60), which  
650 likely restricts iron from *C. trachomatis* infecting the accessible upper layers of the  
651 stratified epithelia. In fact, it was recently demonstrated that *C. trachomatis*  
652 development is attenuated in the terminally differentiated layers of an *in vitro*-generated  
653 stratified squamous epithelium (61). Collectively, LGT conditions that favor *C.*  
654 *trachomatis* infection may be marked by concomitant iron limitation and indole  
655 accessibility. For *C. trachomatis*, iron limitation may therefore serve as a critical signal in  
656 the LGT, inducing the expression of *trpBA* such that Trp is stockpiled from available  
657 indole, allowing the pathogen to counteract oncoming IFN- $\gamma$ -mediated Trp starvation.  
658 We propose the possibility that iron limitation in the LGT may be a significant predictor  
659 of pathogen colonization in the UGT.  
660 Finally, and of note, the expression of the ribonucleotide diphosphate-reductase  
661 encoding *nrdAB* was also recently shown to be iron-regulated in *C. trachomatis* (37).  
662 The regulation of *nrdAB* is known to be mediated by the presumably  
663 deoxyribonucleotide-dependent transcriptional repressor NrdR, encoded distal to the  
664 *nrdAB* locus (62). As NrdR activity is not known to be modulated by iron availability, this  
665 raises the intriguing possibility that here too a unique iron-dependent mechanism of  
666 regulation may integrate the chlamydial stress response to promote a unified response

667 across various stress conditions. Future studies may require more metabolomics-based  
668 approaches to thoroughly dissect the integration of these stress responses, as  
669 transcriptome analyses alone often miss broader, pathway-oriented metabolic  
670 coordination. Ultimately, these studies point towards a need to carefully re-evaluate the  
671 molecular stress response in *Chlamydia*, using more targeted approaches to answer  
672 more specific questions. We anticipate that the rapid progress of the field in recent  
673 years will continue to catalyze exciting and important discoveries regarding the  
674 fundamental biology of *Chlamydia*.

## 675 **Materials and Methods**

676 Please refer to the *SI Appendix* for a complete and detailed description of all  
677 experimental reagents and methodology. For all infections, *Chlamydia trachomatis* LGV  
678 serological variant type II was used to infect human cervical epithelial adenocarcinoma  
679 HeLa cells at a multiplicity of infection of 2 or 5, depending on experiment. Indirect  
680 immunofluorescent confocal microscopy experiments were performed on a Leica TCS  
681 SP8 laser scanning confocal microscope in the Integrative Physiology and  
682 Neuroscience Advanced Imaging Center at Washington State University. RT-qPCR and  
683 qPCR experiments were performed essentially as described (35, 37). Transcript  
684 abundance was normalized to genome copy number for all RT-qPCR analyses. RACE  
685 experiments were conducted using the SMARTer® RACE 5'/3' Kit (Takara Bio) with  
686 minor modifications as noted in *SI Materials and Methods*. RACE products were  
687 isolated by gel extraction using the Macherey-Nagel Nucleospin PCR/gel clean-up kit  
688 (Takara Bio) and sent to Eurofins Genomics, LLC for sequencing. Sequenced RACE  
689 products were mapped to the *C. trachomatis* L2 434/Bu genome (NCBI Accession:

690 NC\_010287) by nucleotide BLAST on the NCBI server. The *E. coli* YtgR reporter assay  
691 was performed essentially as described (34) with minor modifications as indicated in *SI*  
692 *Materials and Methods*. Briefly, BL21 (DE3) *E. coli* were co-transformed with the  
693 indicated pCCT and pET vectors and clonal populations were selected on double-  
694 selective media. Clones were cultured in double-selective media and recombinant YtgR  
695 expression was induced by the addition of IPTG prior to induction of *lacZ* expression by  
696 the addition of L-arabinose. Cell lysates were collected and  $\beta$ -galactosidase activity was  
697 measured by the Miller Assay (63).

698 **Acknowledgements.** We thank Dr. Amanda Brinkworth, Liam Caven, Korinn Murphy  
699 and Matthew Romero for critical review of this manuscript; Christopher C. Thompson for  
700 the establishment of the *E. coli* YtgR reporter system and generation of the pCCT  
701 construct; Dr. David Dewitt for expert advice, training and maintenance of equipment in  
702 the IPN Advanced Imaging Center. This work was supported by NIH grants 5RO1-  
703 AI065545-07 to R.A.C.; 1F31AI136295-01A1 and 5T32GM008336-29 to N.D.P.; N.D.P.  
704 was also supported by an Achievement Reward for College Scientists (ARCS; Seattle  
705 Chapter) Fellowship.

## 706 **References**

- 707 1. Skaar EP (2010) The battle for iron between bacterial pathogens and their  
708 vertebrate hosts. *PLoS Pathog* 6(8):1–2.
- 709 2. Eisenreich W, Dandekar T, Heesemann J, Goebel W (2010) Carbon metabolism  
710 of intracellular bacterial pathogens and possible links to virulence. *Nat Rev*  
711 *Microbiol* 8(6):401–412.
- 712 3. Brown SA, Palmer KL, Whiteley M (2008) Revisiting the host as a growth

- 713 medium. *Nat Rev Microbiol* 6(9):657–666.
- 714 4. Ray K, Marteyn B, Sansonetti PJ, Tang CM (2009) Life on the inside: The  
715 intracellular lifestyle of cytosolic bacteria. *Nat Rev Microbiol* 7(5):333–340.
- 716 5. Hood MI, Skaar EP (2012) Nutritional immunity: Transition metals at the  
717 pathogen-host interface. *Nat Rev Microbiol* 10(8):525–537.
- 718 6. CDC (2017) *2016 Sexually Transmitted Diseases Surveillance - Chlamydia*  
719 Available at: <https://www.cdc.gov/std/stats16/chlamydia.htm>.
- 720 7. Taylor HR, Burton MJ, Haddad D, West S, Wright H (2014) Trachoma. *Lancet*  
721 384(9960):2142–2152.
- 722 8. Newman L, et al. (2015) Global Estimates of the Prevalence and Incidence of  
723 Four Curable Sexually Transmitted Infections in 2012 Based on Systematic  
724 Review and Global Reporting. *PLoS One* 10(12):1–17.
- 725 9. Hafner LM (2015) Pathogenesis of fallopian tube damage caused by Chlamydia  
726 trachomatis infections. *Contraception* 92(2):108–115.
- 727 10. Moore ER, Ouellette SP (2014) Reconceptualizing the chlamydial inclusion as a  
728 pathogen-specified parasitic organelle: an expanded role for Inc proteins. *Front*  
729 *Cell Infect Microbiol* 4(October):1–10.
- 730 11. AbdelRahman YM, Belland RJ (2005) The chlamydial developmental cycle.  
731 *FEMS Microbiol Rev* 29(5):949–959.
- 732 12. Clarke IN (2011) Evolution of Chlamydia trachomatis. *Ann N Y Acad Sci* 1230:11–  
733 18.
- 734 13. Stephens RS, et al. (1998) Genome sequence of an obligate intracellular  
735 pathogen of humans: Chlamydia trachomatis. *Science (80- )* 282(5389):754–759.



- 736 14. Wyrick PB (2010) Chlamydia trachomatis Persistence In Vitro: An Overview. *J*  
737 *Infect Dis* 201:88–95.
- 738 15. Byrne GI, Lehmann LK, Landry GJ (1986) Induction of tryptophan catabolism is  
739 the mechanism for gamma-interferon-mediated inhibition of intracellular  
740 Chlamydia psittaci replication in T24 cells. *Infect Immun* 53(2):347–351.
- 741 16. Taylor MW, Feng GS (1991) Relationship between interferon-gamma,  
742 indoleamine 2,3-dioxygenase, and tryptophan catabolism. *FASEB J* 5(11):2516–  
743 2522.
- 744 17. Fehlner-Gardiner C, et al. (2002) Molecular basis defining human Chlamydia  
745 trachomatis tissue tropism: A possible role for tryptophan synthase. *J Biol Chem*  
746 277(30):26893–26903.
- 747 18. Macchiarulo A, Camaioni E, Nuti R, Pellicciari R (2009) Highlights at the gate of  
748 tryptophan catabolism: a review on the mechanisms of activation and regulation  
749 of indoleamine 2,3-dioxygenase (IDO), a novel target in cancer disease. *Amino*  
750 *Acids* 37:219–229.
- 751 19. Wood H, Roshick C, McClarty G (2004) Tryptophan recycling is responsible for  
752 the interferon- $\gamma$  resistance of Chlamydia psittaci GPIC in indoleamine  
753 dioxygenase-expressing host cells. *Mol Microbiol* 52(3):903–916.
- 754 20. Carlson JH, Wood H, Roshick C, Caldwell HD, McClarty G (2006) In vivo and in  
755 vitro studies of Chlamydia trachomatis TrpR:DNA interactions. *Mol Microbiol*  
756 59(6):1678–1691.
- 757 21. Akers JC, Tan M (2006) Molecular mechanism of tryptophan-dependent  
758 transcriptional regulation in Chlamydia trachomatis. *J Bacteriol* 188(12):4236–

- 759 4243.
- 760 22. Wood H, et al. (2003) Regulation of tryptophan synthase gene expression in  
761 *Chlamydia trachomatis*. *Mol Microbiol* 49(5):1347–1359.
- 762 23. Merino E, Yanofsky C (2005) Transcription attenuation: A highly conserved  
763 regulatory strategy used by bacteria. *Trends Genet* 21(5):260–264.
- 764 24. Cassat JE, Skaar EP (2013) Iron in Infection and Immunity. *Cell Host Microbe*  
765 13(5):509–519.
- 766 25. Raulston JE (1997) Response of *Chlamydia trachomatis* serovar E to iron  
767 restriction in vitro and evidence for iron-regulated chlamydial proteins. *Infect*  
768 *Immun* 65(11):4539–4547.
- 769 26. Ouellette SP, Carabeo RA (2010) A functional slow recycling pathway of  
770 transferrin is required for growth of *Chlamydia*. *Front Microbiol* 1(OCT):1–12.
- 771 27. Igietseme JU, Ananaba GA, Candal DH, Lyn D, Black CM (1998) Immune control  
772 of Chlamydial growth in the human epithelial cell line RT4 involves multiple  
773 mechanisms that include nitric oxide induction, tryptophan catabolism and iron  
774 deprivation. *Microbiol Immunol* 42(9):617–625.
- 775 28. Nairz M, et al. (2008) Interferon- $\gamma$  limits the availability of iron for intramacrophage  
776 *Salmonella typhimurium*. *Eur J Immunol* 38(7):1923–1936.
- 777 29. Byrd T, Horwitz MA (1989) Interferon gamma-activated human monocytes  
778 downregulate transferrin receptors and inhibit the intracellular multiplication of  
779 *Legionella pneumophila* by limiting the availability of iron. *J Clin Invest*  
780 83(5):1457–1465.
- 781 30. Byrd TF, Horwitz MA (1993) Regulation of transferrin receptor expression and

- 782 ferritin content in human mononuclear phagocytes: Coordinate upregulation by  
783 iron transferrin and downregulation by interferon gamma. *J Clin Invest* 91(3):969–  
784 976.
- 785 31. Pokorzynski ND, Thompson CC, Carabeo RA (2017) Ironing Out the  
786 Unconventional Mechanisms of Iron Acquisition and Gene Regulation in  
787 Chlamydia. *Front Cell Infect Microbiol* 7(September):1–19.
- 788 32. Miller JD, Sal MS, Schell M, Whittimore JD, Raulston JE (2009) Chlamydia  
789 trachomatis YtgA is an iron-binding periplasmic protein induced by iron restriction.  
790 *Microbiology* 155(9):2884–2894.
- 791 33. Akers JC, HoDac H, Lathrop RH, Tan M (2011) Identification and functional  
792 analysis of CT069 as a novel transcriptional regulator in Chlamydia. *J Bacteriol*  
793 193(22):6123–6131.
- 794 34. Thompson CC, Nicod SS, Malcolm DS, Grieshaber SS, Carabeo RA (2012)  
795 Cleavage of a putative metal permease in Chlamydia trachomatis yields an iron-  
796 dependent transcriptional repressor. *Proc Natl Acad Sci U S A* 109(26):10546–51.
- 797 35. Thompson CC, Carabeo RA (2011) An optimal method of iron starvation of the  
798 obligate intracellular pathogen, Chlamydia trachomatis. *Front Microbiol* 2(20).  
799 doi:10.3389/fmicb.2011.00020.
- 800 36. Dill BD, Dessus-Babus S, Raulston JE (2009) Identification of iron-responsive  
801 proteins expressed by Chlamydia trachomatis reticulate bodies during intracellular  
802 growth. *Microbiology* 155(1):210–219.
- 803 37. Brinkworth AJ, Wildung MR, Carabeo RA (2018) Genomewide Transcriptional  
804 Responses of Iron-Starved Chlamydia trachomatis Reveal Prioritization of

- 805 Metabolic Precursor Synthesis over Protein Translation. *mSystems* 3(1):e00184-  
806 17.
- 807 38. Raulston JE, et al. (2007) Identification of an iron-responsive protein that is  
808 antigenic in patients with Chlamydia trachomatis genital infections. *FEMS*  
809 *Immunol Med Microbiol* 51(3):569–576.
- 810 39. Belland RJ, et al. (2003) Transcriptome analysis of chlamydial growth during IFN-  
811 gamma-mediated persistence and reactivation. *Proc Natl Acad Sci U S A*  
812 100(26):15971–15976.
- 813 40. Østergaard O, et al. (2016) Quantitative Protein Profiling of Chlamydia  
814 trachomatis Growth Forms Reveals Defense Strategies Against Tryptophan  
815 Starvation. *Mol Cell Proteomics* 15(12):3540–3550.
- 816 41. Ricci S, Ratti G, Scarlato V (1995) Transcriptional regulation in the Chlamydia  
817 trachomatis pCT plasmid. *Gene* 154(1):93–98.
- 818 42. Tao X, Boydt J, Murphy JR (1992) Specific binding of the diphtheria tox regulatory  
819 element DtxR to the tox operator requires divalent heavy metal ions and a 9-base-  
820 pair interrupted palindromic sequence. *Proc Natl Acad Sci U S A* 89(13):5897–  
821 5901.
- 822 43. Schmitt MP (2002) Analysis of a DtxR-Like Metalloregulatory Protein, MntR, from  
823 *Corynebacterium diphtheriae* That Controls Expression of an ABC Metal  
824 Transporter by an Mn(2+)-Dependent Mechanism. *J Bacteriol* 184(24):6882–  
825 6892.
- 826 44. Colin J, et al. (2014) Roadblock termination by reb1p restricts cryptic and  
827 readthrough transcription. *Mol Cell* 56(5):667–680.

- 828 45. Ouellette SP, Rueden KJ, Rucks EA (2016) Tryptophan codon-dependent  
829 transcription in chlamydia pneumoniae during gamma interferon-mediated  
830 tryptophan limitation. *Infect Immun* 84(9):2703–2713.
- 831 46. Gralla JD (1989) Bacterial gene regulation from distant DNA sites. *Cell* 57(2):193–  
832 195.
- 833 47. Sankar A (1989) Multipartite genetic control elements: communication by DNA  
834 loop. *Annu Rev Genet* 23(53):227–250.
- 835 48. Wu HC, Tyson KL, Cole JA, Busby SJW (1998) Regulation of transcription  
836 initiation at the Escherichia coli nir operon promoter: A new mechanism to  
837 account for co-dependence on two transcription factors. *Mol Microbiol* 27(2):493–  
838 505.
- 839 49. Yanofsky C (1981) Attenuation in the control of expression of bacterial operons.  
840 *Nature* 289(5800):751–758.
- 841 50. Yanofsky C, Kelley RL, Horn V (1984) Repression is relieved before attenuation in  
842 the trp operon of Escherichia coli as tryptophan starvation becomes increasingly  
843 severe. *J Bacteriol* 158(3):1018–1024.
- 844 51. Gollnick P, Babitzke P, Antson A, Yanofsky C (2005) Complexity in regulation of  
845 tryptophan biosynthesis in Bacillus subtilis. *Annu Rev Genet* 39(October):47–68.
- 846 52. Mueller KE, Wolf K, Fields KA (2016) Gene Deletion by Fluorescence-Reported  
847 Allelic Exchange Mutagenesis in Chlamydia trachomatis. 7(1):1–9.
- 848 53. Ouellette SP (2018) Feasibility of a Conditional Knockout System for Chlamydia  
849 Based on CRISPR Interference. *Front Cell Infect Microbiol* 8(February).  
850 doi:10.3389/fcimb.2018.00059.

- 851 54. Sasaki-Imamura T, Yoshida Y, Suwabe K, Yoshimura F, Kato H (2011) Molecular  
852 basis of indole production catalyzed by tryptophanase in the genus *Prevotella*.  
853 *FEMS Microbiol Lett* 322(1):51–59.
- 854 55. Ziklo N, Huston WM, Hocking JS, Timms P (2016) *Chlamydia trachomatis* Genital  
855 Tract Infections: When Host Immune Response and the Microbiome Collide.  
856 *Trends Microbiol* 24(9):750–765.
- 857 56. Valenti P, et al. (2018) Role of Lactobacilli and Lactoferrin in the Mucosal  
858 Cervicovaginal Defense. *Front Immunol* 9(March):1–14.
- 859 57. Spear GT, et al. (2011) Multiplex immunoassay of lower genital tract mucosal fluid  
860 from women attending an urban STD clinic shows broadly increased IL1 $\beta$  and  
861 lactoferrin. *PLoS One* 6(5):1–7.
- 862 58. Kelder ME, et al. (1996) Estrogen regulation of lactoferrin expression in human  
863 endometrium. *Am J Reprod Immunol* 36(5):243–247.
- 864 59. Cohen M, Britigan B, French M, Bean K (1987) Preliminary observations on  
865 lactoferrin secretion in human vaginal mucus: variation during the menstrual  
866 cycle, evidence of hormonal regulation, and implications for infection with  
867 *Neisseria gonorrhoeae*. *Am J Obstet Gynecol* 157(5):1122–1125.
- 868 60. Lloyd JM, O'Dowd T, Driver M, Tee DE (1984) Demonstration of an epitope of the  
869 transferrin receptor in human cervical epithelium--a potentially useful cell marker.  
870 *J Clin Pathol* 37(2):131–135.
- 871 61. Nogueira AT, Braun KM, Carabeo RA (2017) Characterization of the Growth of  
872 *Chlamydia trachomatis* in In Vitro-Generated Stratified Epithelium. *Front Cell*  
873 *Infect Microbiol* 7(October):1–16.

- 874 62. Case EDR, Akers JC, Tan M (2011) CT406 encodes a chlamydial ortholog of  
875 NrdR, a repressor of ribonucleotide reductase. *J Bacteriol* 193(17):4396–4404.
- 876 63. Miller JH (1972) Assay of  $\beta$ -galactosidase. *Experiments in Molecular Genetics*  
877 (Cold Spring Harbor Laboratory Press).

## 878 **Figure Legends**

879 **Fig. 1.** Brief iron limitation via 2,2-bipyridyl treatment precedes the onset of  
880 characteristic chlamydial persistence. (A) *C. trachomatis* L2-infected HeLa cells were  
881 fixed and stained with convalescent human sera to image inclusion morphology by  
882 confocal microscopy following Bpdl treatment at the indicated times post-infection.  
883 Arrowheads indicate inclusions with visibly fewer organisms in the 12-hour Bpdl-treated  
884 condition. Figure shows representative experiment of three biological replicates. (B)  
885 Genomic DNA (gDNA) was harvested from infected HeLa cells at the indicated times  
886 post-infection under iron-replete (blue) and -deplete (red) conditions. Chlamydial  
887 genome copy number was quantified by qPCR. Chlamydial genome replication is  
888 stalled following 12 hours of Bpdl treatment, but not 6. N=2. (C) Total RNA was  
889 harvested from infected HeLa cells at the indicated times post-infection under iron-  
890 replete (teal) and -deplete (orange) conditions. The transcript abundance of hallmark  
891 persistence genes *euo* and (D) *omcB* were quantified by RT-qPCR and normalized  
892 against genome copy number. Only at 12 hours of Bpdl treatment is *omcB* expression  
893 significantly affected. N=3 for 12+6, N=2 for 12+12. Statistical significance was  
894 determined by One-Way ANOVA followed by post-hoc pairwise *t*-tests with Bonferroni's  
895 correction for multiple comparisons. \* =  $p < 0.05$ , \*\* =  $p < 0.01$ , \*\*\* =  $p < 0.005$ .

896

897 **Fig. 2.** Brief iron limitation condition produces mild iron-starved transcriptional  
898 phenotype. (A) Total RNA and gDNA was harvested from infected HeLa cells at the  
899 indicated times post-infection under iron-replete (teal) and -deplete (orange) conditions.  
900 The transcript abundance of iron-regulated *ytgA*, (B) *ahpC*, (C) *devB* and (D) non-iron  
901 regulated *dnaB* were quantified by RT-qPCR and normalized against genome copy  
902 number. The transcript expression of *ytgA* and *ahpC* were significantly elevated  
903 following 6-hour Bpdl treatment, indicative of iron starvation to *C. trachomatis*. N=3.  
904 Statistical significance was determined by One-Way ANOVA followed by post-hoc  
905 pairwise *t*-tests with Bonferroni's correction for multiple comparisons. \* =  $p < 0.05$ , \*\* =  $p$   
906  $< 0.01$ , \*\*\* =  $p < 0.005$ .

907  
908 **Fig. 3.** Expression of the *trpRBA* operon in *C. trachomatis* is non-uniformly regulated by  
909 brief iron limitation. (A) Cartoon depiction of the *trpRBA* operon (drawn to scale) with the  
910 primary transcriptional start site upstream of *trpR* annotated. (B) Total RNA and gDNA  
911 were harvested from infected HeLa cells at the indicated times post-infection under Trp-  
912 replete (black) and -deplete (red) conditions. The transcript expression of *trpRBA*  
913 operon was quantified by RT-qPCR and normalized against genome copy number. All  
914 three ORFs are significantly induced relative to 12 hpi following Trp starvation. N=2. (C)  
915 Total RNA and gDNA were harvested from infected HeLa cells at the indicated times  
916 post-infection under iron-replete (blue) and -deplete (red) conditions. The transcript  
917 expression of *trpRBA* operon was quantified by RT-qPCR and normalized against  
918 genome copy number. Only *trpB* and *trpA* expression was significantly induced relative  
919 to 12 hpi. N=3. Statistical significance was determined by One-Way ANOVA followed by



920 post-hoc pairwise *t*-tests with Bonferroni's correction for multiple comparisons. \* =  $p <$   
921 0.05, \*\* =  $p < 0.01$ , \*\*\* =  $p < 0.005$ .

922

923 **Fig. 4.** Iron-dependent induction of *trpBA* expression initiates within the *trpRBA*  
924 intergenic region from a novel alternative transcriptional start site. (A) Total RNA was  
925 harvested from infected HeLa cells at the indicated times post-infection to examine iron-  
926 dependent and Trp-dependent changes in the 5'-cDNA profile of the *trpRBA* operon by  
927 Rapid Amplification of 5' cDNA Ends (5'-RACE). RACE products were separated on an  
928 agarose gel, revealing three distinct and specific bands with apparent sizes of 1.5, 1.1  
929 and 1.0 kb. Trp depletion led to the apparent enrichment of the 1.5 kb product, while  
930 Bpdl treatment produced a similarly enriched 1.0 kb RACE product. Figure shows  
931 representative experiment of three biological replicates. (B) To confirm that iron-  
932 dependent induction of *trpBA* could originate from alternative transcription initiation, RT-  
933 qPCR was performed on 5'-RACE cDNA to quantify the abundance of *trpB* transcripts  
934 relative to *trpR*. Only under iron-limited conditions were *trpB* transcripts enriched relative  
935 to *trpR*. N=3. Statistical significance determined by One-way ANOVA followed by post-  
936 hoc pairwise *t*-tests. \* =  $p < 0.05$ , \*\* =  $p < 0.01$ , \*\*\* =  $p < 0.005$ . (C) The nucleotide  
937 position of the 5' cDNA ends generated from RACE were mapped to the *C. trachomatis*  
938 L2 434/Bu genome by nucleotide BLAST. Figure displays histogram (discrete; bin  
939 width=20) and overlaid density plot (continuous) distribution of 5' nucleotide positions  
940 generated from each 5'-RACE product. The dotted line represents the weighted mean  
941 of the distribution, as indicated by the integer value above each line. The identified alt.  
942 TSSs are depicted on the *trpRBA* operon (drawn to scale) above the plot. N=3.

943

944 **Fig. 5.** Ectopically expressed YtgR domain is capable of binding the putative *trpBA*  
945 promoter element in an operator-specific manner and repress transcription in a  
946 heterologous system. (A) Identification of putative YtgR operator sequence by local and  
947 global nucleotide sequence alignment using EMBOSS Water and Needle algorithms,  
948 respectively, to align the previously identified YtgR operator to both the *trpRBA* IGR and  
949 palindromic candidate sequence. The palindrome was then mutated in our YtgR  
950 repression assay as depicted to abolish palindromicity and AT-richness. (B) Ectopic  
951 expression of YtgR significantly represses  $\beta$ -galactosidase activity only from the  
952 promoter of its own operon, *ytgABCD*, and not from an empty vector or another iron-  
953 regulated but presumably non-YtgR targeted promoter, *lpdA*.  $3 \leq N \leq 2$ . (C) Expression  
954 of recombinant YtgR represses  $\beta$ -galactosidase activity from the putative *trpBA*  
955 promoter element, but not the *trpR* promoter, and this repression is dependent on the  
956 unaltered operator sequence identified in Fig. 5A.  $3 \leq N \leq 2$ . Statistical significance  
957 determined by two-sided unpaired Student's *t*-test with Welch's correction for unequal  
958 variance. \* =  $p < 0.05$ , \*\* =  $p < 0.01$ , \*\*\* =  $p < 0.005$ .

959

960 **Fig. 6.** Transcription termination at *trpRBA* YtgR operator site coincides with iron-  
961 dependent transcription read-through. (A) Total RNA was harvested from *C.*  
962 *trachomatis*-infected HeLa cells to analyze 3'-cDNA landscape downstream of *trpR*  
963 promoter. The top panel displays representative RT-PCR of full-length *trpRBA* message  
964 across experimental conditions (NTC = No Template Control). Bottom panel depicts  
965 electrophoresed 3'-RACE products and estimated sizes. N=3. (B) 3'-RACE products

966 were sequenced and mapped to *C. trachomatis* L2 434/Bu genome by nucleotide  
967 BLAST. The 0.40 kb RACE product mapped to a region overlapping the predicted YtgR  
968 operator site, as indicated by the cartoon depiction of the *trpRBA* operon (drawn to  
969 scale) above the plot. N=3. (C) Analysis of transcription read-through by RT-qPCR was  
970 performed on 3'-RACE cDNAs at three distinct loci across the *trpRBA* operon  
971 representing upstream transcription initiation (511,416-531), YtgR operator site  
972 termination (511,639-764) and terminal *trpBA* transcription (513,856-968). Abundance  
973 of each amplicon was normalized to a region (Read-through) predicted to be transcribed  
974 only as a part of the full-length product based on 5' and 3'-RACE data (511,792-  
975 512,080). Thus, the ratio of each amplicon to the normalization amplicon represents the  
976 proportion of that amplicon encoded as part of the full-length transcript, approaching  
977 one as the two more closely coincide. At the YtgR operator termination site, iron  
978 limitation reduces the ratio relative to 12 hpi, suggesting that transcription read-through  
979 increases at this site under this condition. The transcription initiation ratio is unaffected  
980 by iron limitation, while the terminal *trpBA* amplicon is increased, consistent with  
981 alternative transcription from the alt. TSS. Statistical significance determined by One-  
982 way ANOVA followed by post-hoc pairwise *t*-tests. \* =  $p < 0.05$ , \*\* =  $p < 0.01$ , \*\*\* =  $p <$   
983 0.005.

984

985 **Author Contributions:** N.D.P. and R.A.C. wrote the manuscript; N.D.P. and R.A.C.  
986 designed the experiments; N.D.P. performed the experiments; N.D.P. and R.A.C.  
987 analyzed and interpreted the data.

988

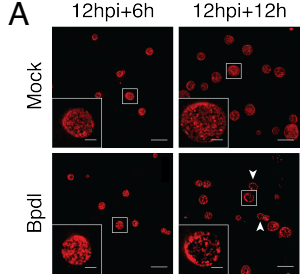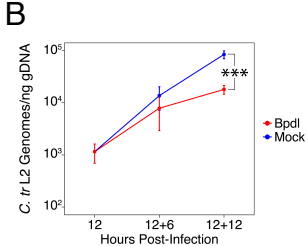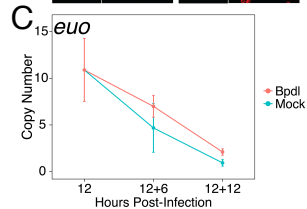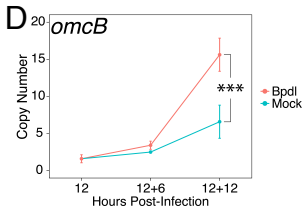

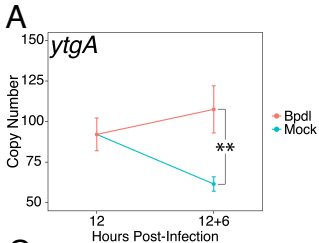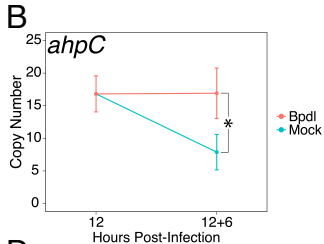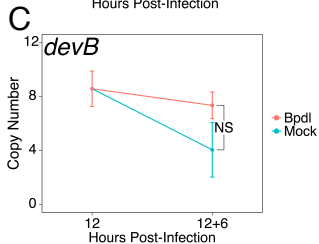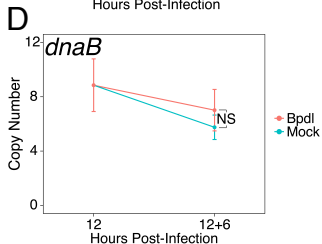

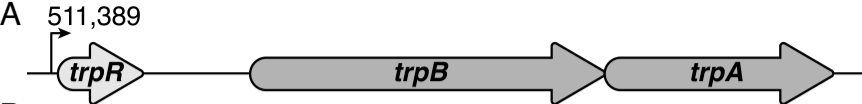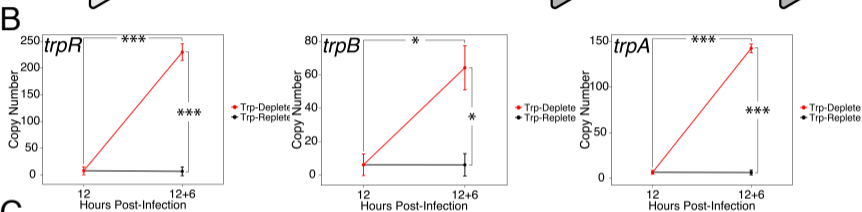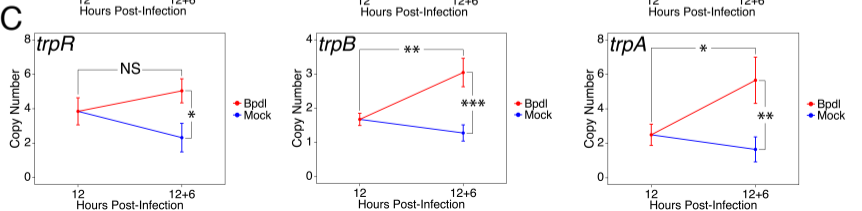

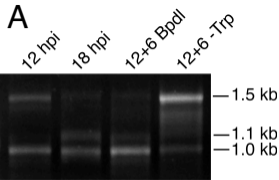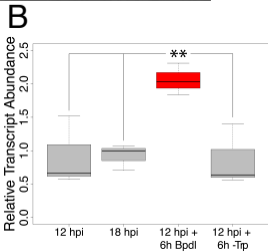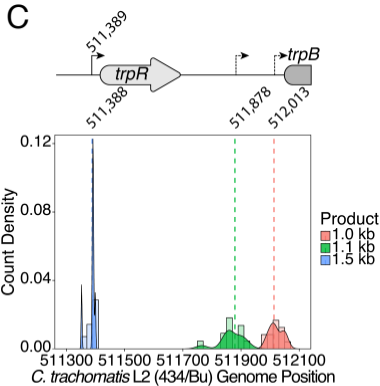

**A**

|                    |     | Local Pairwise Alignment     |     | Identity |
|--------------------|-----|------------------------------|-----|----------|
| YtgR Operator      | 2   | CTCTTCGAGATGA                | 14  | 76.9%    |
| <i>trpRBA</i> IGR  | 123 | CTTTTCAAGCTGA                | 135 |          |
|                    |     | Global Pairwise Alignment    |     | Identity |
| YtgR Operator      | 1   | -----TCTCTTCGAGATGAGAAA      | 18  | 43.5%    |
| Palindrome         | 1   | AATCAGCTTTTCAAGCTGAT T--     | 21  |          |
| Palindrome         | 5'  | AATCAGCTTTTCAAGCTGATT        | 3'  |          |
| Mutated Palindrome |     | <b>CGGCGGCGGG</b> CAAGCTGATT |     |          |

**B**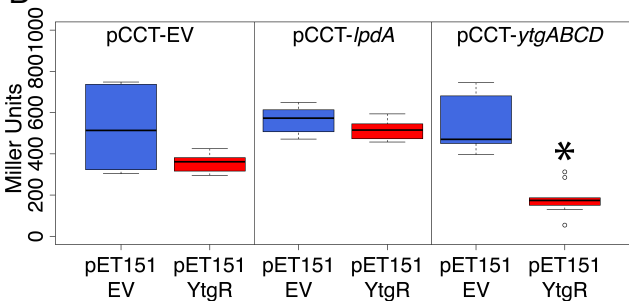**C**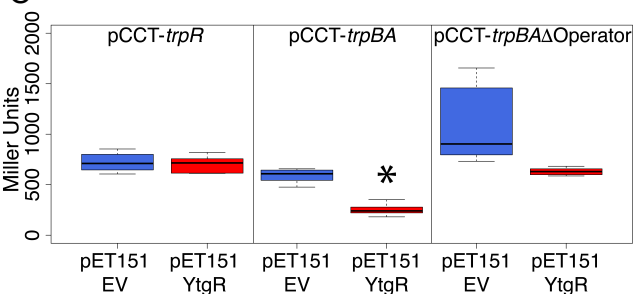



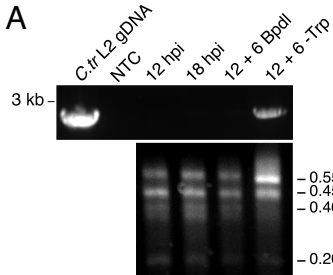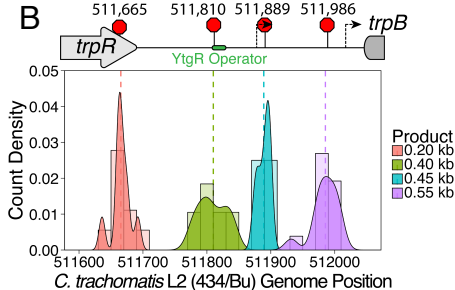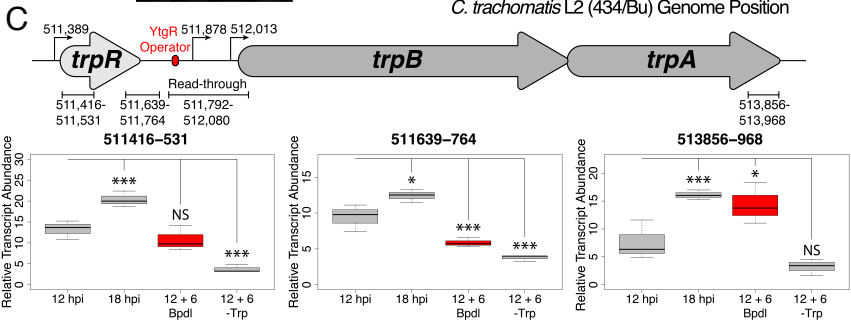

Source: https://www.biorxiv.org/content/10.1101/322586v1.full.pdf
